# Supplementary material for: Single-cell profiling of Arabidopsis leaves to Pseudomonas syringae infection
Source: PubMed Central journal article supplement (PMC10528479; doi:10.1016/j.celrep.2023.112676), 2023-06-20
Supplement: NIHMS1920468-supplement-1.pdf [file NIHMS1920468-supplement-1.pdf]

Cell Reports, Volume 42

## Supplemental information

### Single-cell profiling of *Arabidopsis* leaves to *Pseudomonas syringae* infection

Jie Zhu, Signe Lolle, Andrea Tang, Bella Guel, Brian Kvitko, Benjamin Cole, and Gitta Coaker

Figure S1

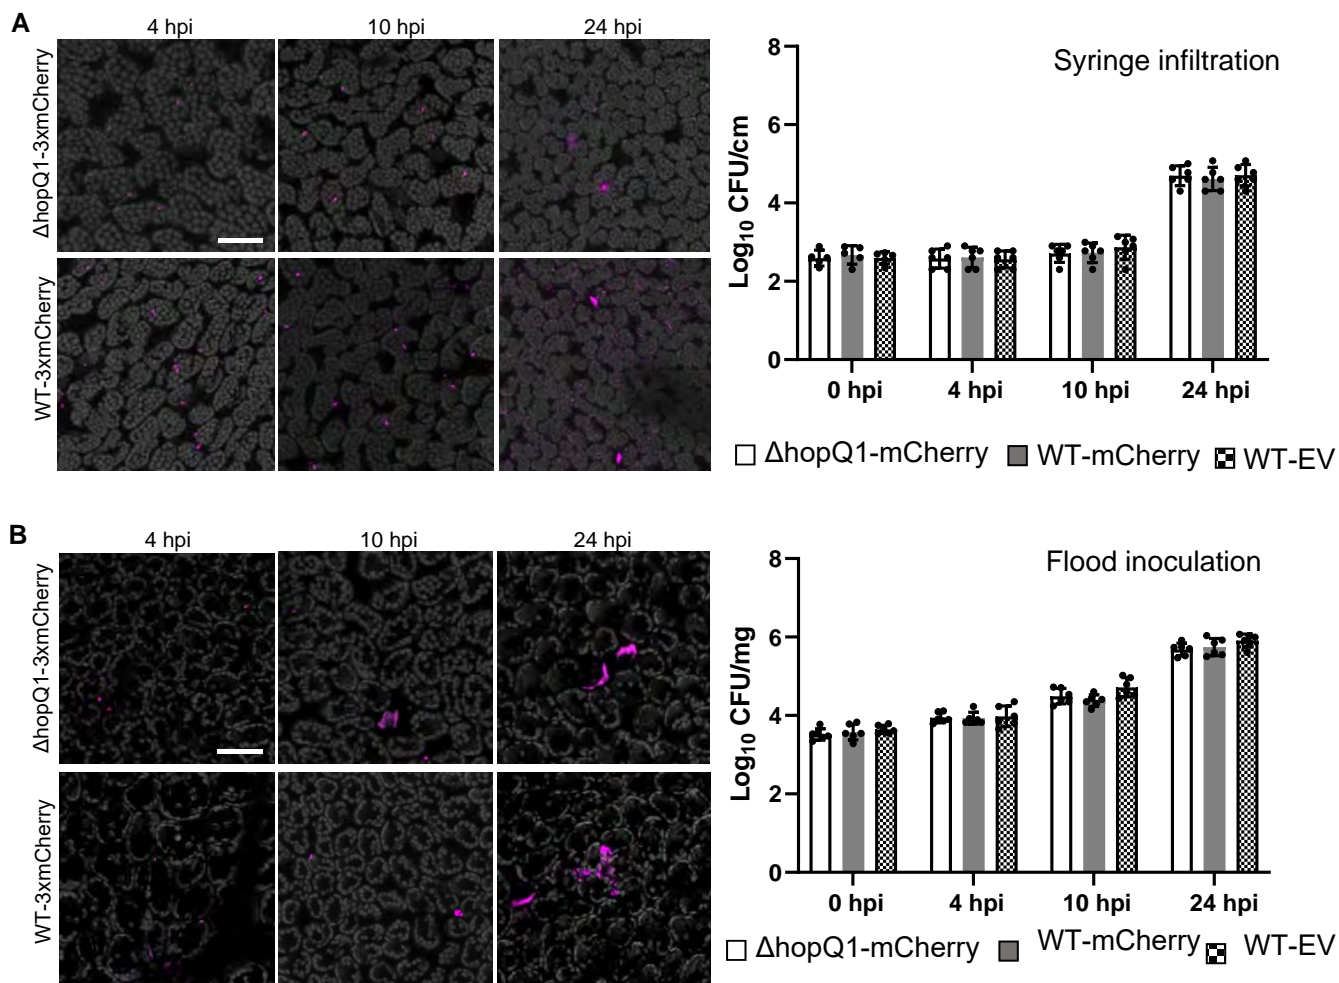

**Figure S1. Comparison of *Pst* DC3000 WT-3xmCherry and *Pst* DC3000  $\Delta$ hopQ1-3xmCherry during infection in *Arabidopsis*. Related to Figure 1.**

(A) Bacterial populations in wild type *Arabidopsis* Col-0 leaves using syringe infiltration. Four-week-old *A. thaliana* leaves were syringe infiltrated with a bacterial suspension of OD600 = 0.0002. Left: Representative images of bacterial colonization at different time points. Pictures are maximum projections from confocal Z stacks. Right: Bacterial growth curve over time. Log<sub>10</sub> CFU/cm<sup>2</sup>, log<sub>10</sub> colony forming units per cm<sup>2</sup> of leaf tissue. Data are means  $\pm$  SD (at least 5 plants used for each strain at each time point). (B) Bacterial populations in wild type *Arabidopsis* Col-0 leaves using flood inoculation. Two-week-old *Arabidopsis* seedlings grown on Murashige-Skoog plates were flood-inoculated with mCherry-tagged *Pst* DC3000 at concentration of  $1 \times 10^7$  colony forming units/ml (CFU/ml). Left: Representative images of bacterial colonization at different time points. Right: Bacterial growth curve over time. Log<sub>10</sub> CFU/mg, log<sub>10</sub> colony-forming units per milligram leaf tissue. Data are means  $\pm$  SD (at least 6 plants used for each strain at each time point). Pictures are maximum projections from confocal Z stacks. Chlorophyll autofluorescence is shown in grey. Scale bars: 50  $\mu$ m.

Figure S2

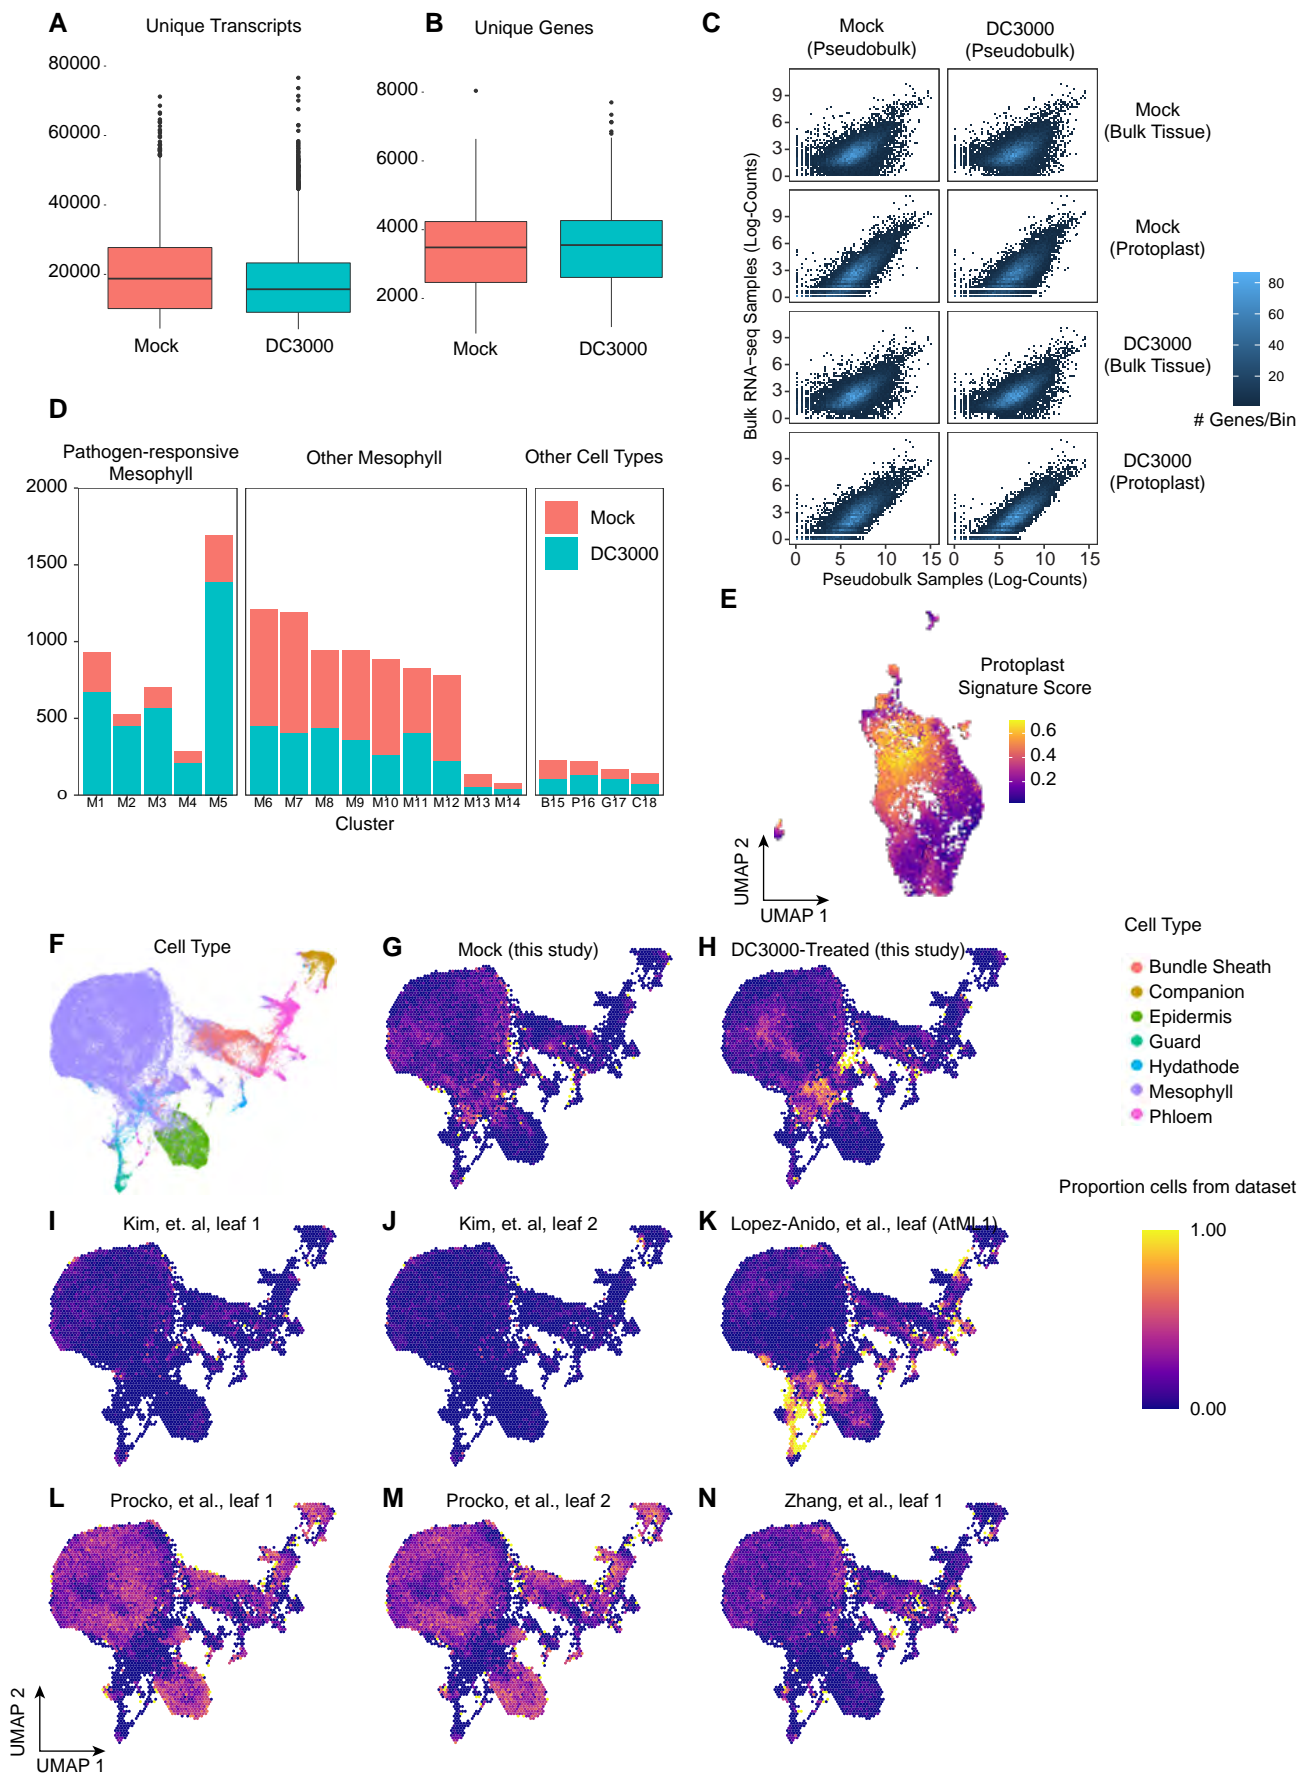

**Figure S2. Data quality of single-cell datasets. Related to Figure 1-2.**

(A-B) Summary statistics of single-cell datasets. Transcript (A) and Gene (B) counts were summarized across all 11,895 cells in the integrated single-cell dataset. Median transcript counts were ~ 17,000 unique molecular identifier (UMI) per cell for both datasets, while median gene counts were ~ 3,500. (C) Comparison with bulk RNA-seq. For Mock- and DC3000-treated single-cell datasets, a “pseudobulk” profile was calculated as the sum of counts per gene for all cells within that dataset. These profiles were compared to mRNA-seq data derived from whole leaves (Bulk Tissue) and pooled protoplasts (Protoplast) isolated in the same manner as those used for single-cell profiling. (D) Cell numbers from *Arabidopsis* leaves infiltrated with *Pst* DC3000 or 10 mM MgCl<sub>2</sub> (Mock) in each cluster. (E) The protoplast signature score is depicted in the UMAP of the combined scRNA-seq datasets. A module score (Protoplast Signature Score) was computed based on genes up- and down-regulated by protoplasting (identified from bulk/protoplast RNA-seq). While heterogeneous, protoplasting does not appear to strongly impact cells within immune/transition/susceptibility clusters. (F-N) Integration of five leaf single-cell datasets from *Arabidopsis* preserves the unique identity of pathogen-treated cells. We integrated *Arabidopsis* leaf single-cell datasets (eight total, over five distinct studies: Kim et al. [S1]; Liu et al. [S2]; Lopez-Anido et al. [S3]; Procko et al. [S4]; Zhang et al. [S5]) together to determine whether pathogen-treated cells remain distinct relative to other sources of cell-cell variation. (F) Cell type distribution in UMAP space for the integrated dataset. (G-N) Proportion of cells in UMAP space belonging to each individual dataset. While the combination of all datasets largely preserved clustering with respect to cell type (F), a region in UMAP space still appeared to be distinct for having *Pst* DC3000-treated identity (H). Heatmap represents proportion of cells for each dataset overlaid onto the integrated UMAP.

Figure S3

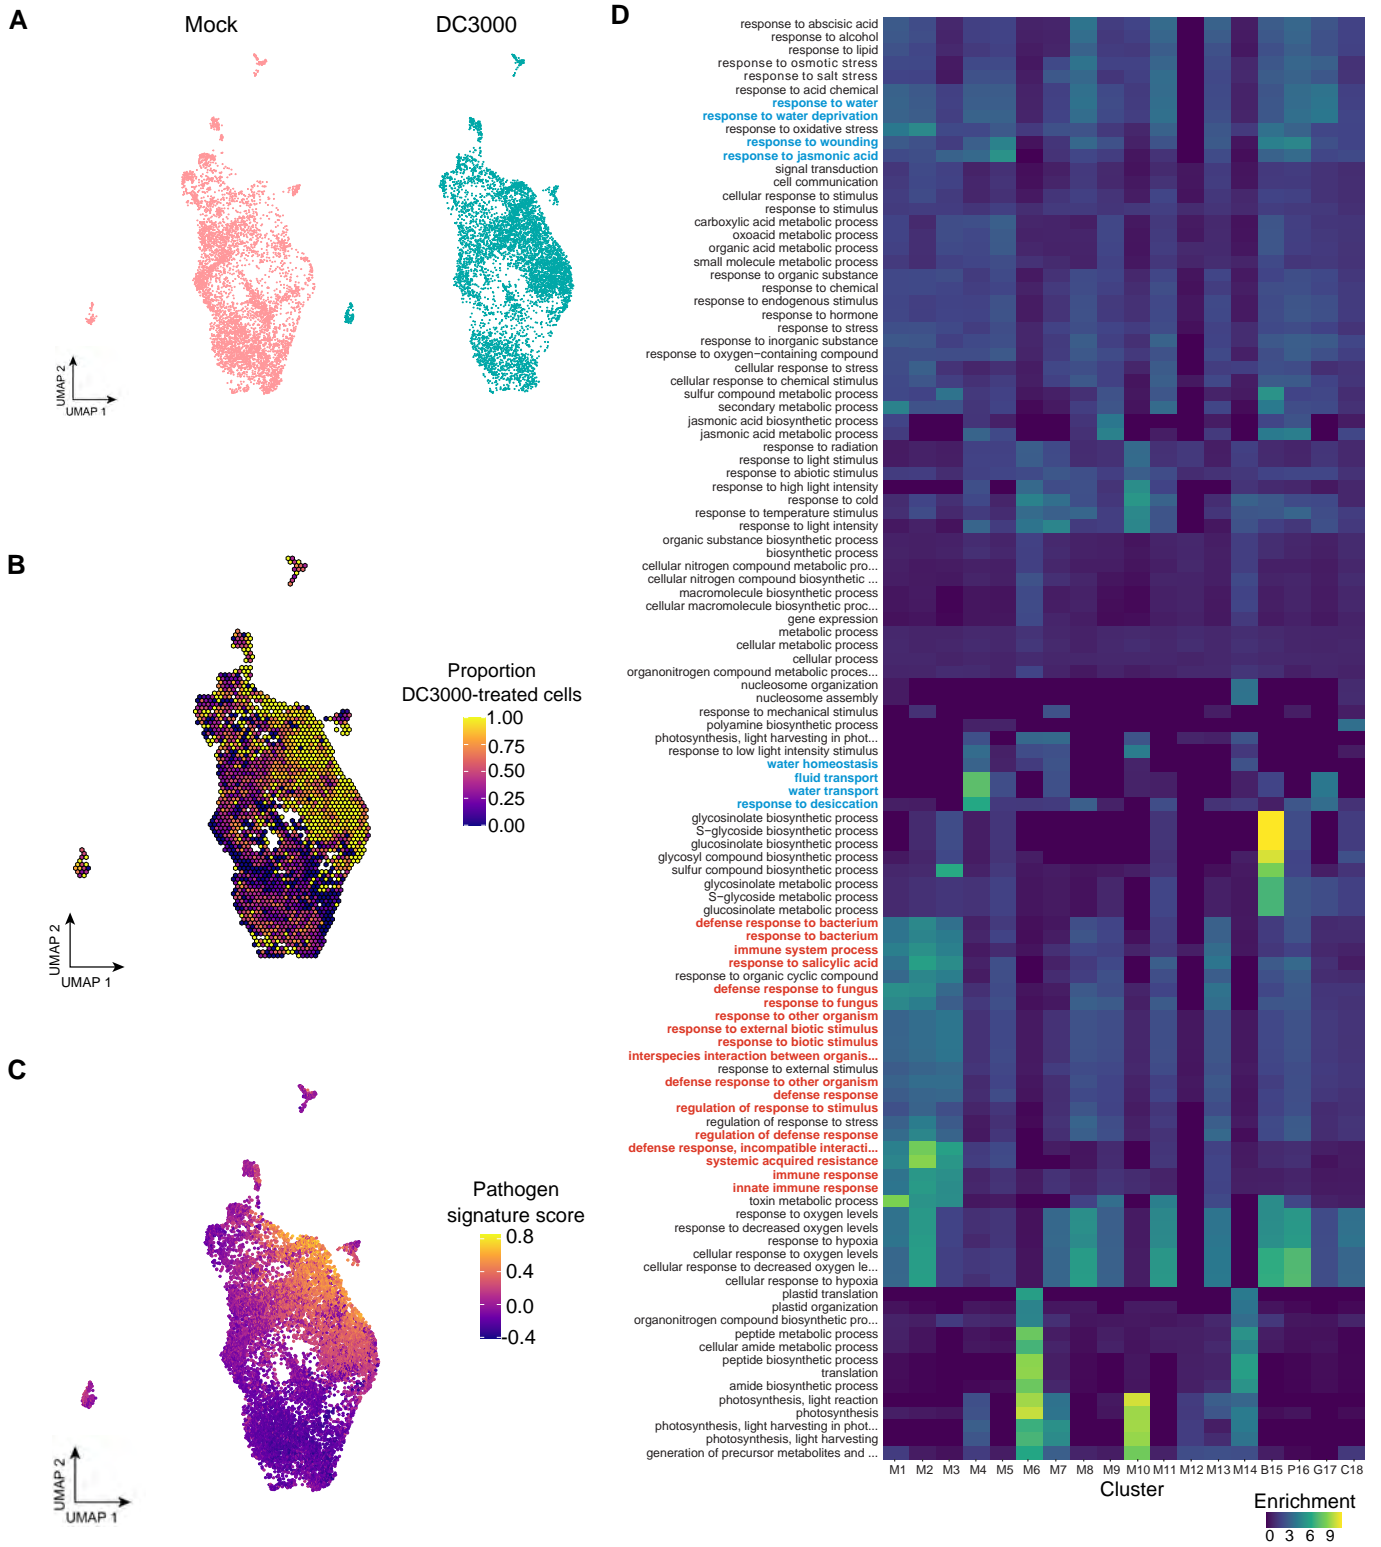

**Figure S3. Clusters M1 – M5 are pathogen-responsive clusters. Related to Figure 2.**

(A) Single Cell Uniform Manifold Approximation and Projection (UMAP) plots from mock-treated samples (Mock) and *Pst* DC3000-treated samples, colored according to treatment. (B) Proportion of DC3000-treated cells is depicted in the UMAP of the combined single-cell RNA-seq datasets. These cells likely represent those that are responsive to pathogen infection. (C) A *Pst* DC3000 signature score was computed as a composite metric quantifying the overall impact that *P. syringae* has on each cell (Methods). The pathogen signature score is depicted in the UMAP of the combined scRNA-seq datasets. (D) GO-term enrichment (number of significant genes divided by the number of expected genes for each term) shows many terms specific to immunity and defense (bold, red) are associated with clusters M1-3, while terms specific to jasmonic acid, wounding and water stress (blue) are associated with clusters M4-5.

Figure S4

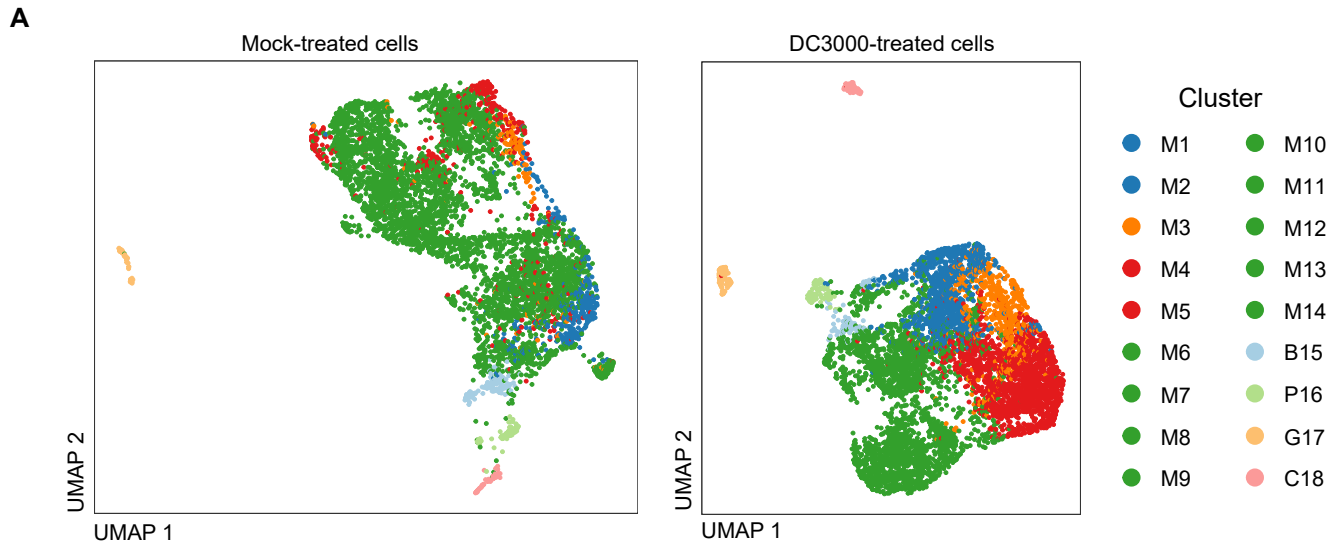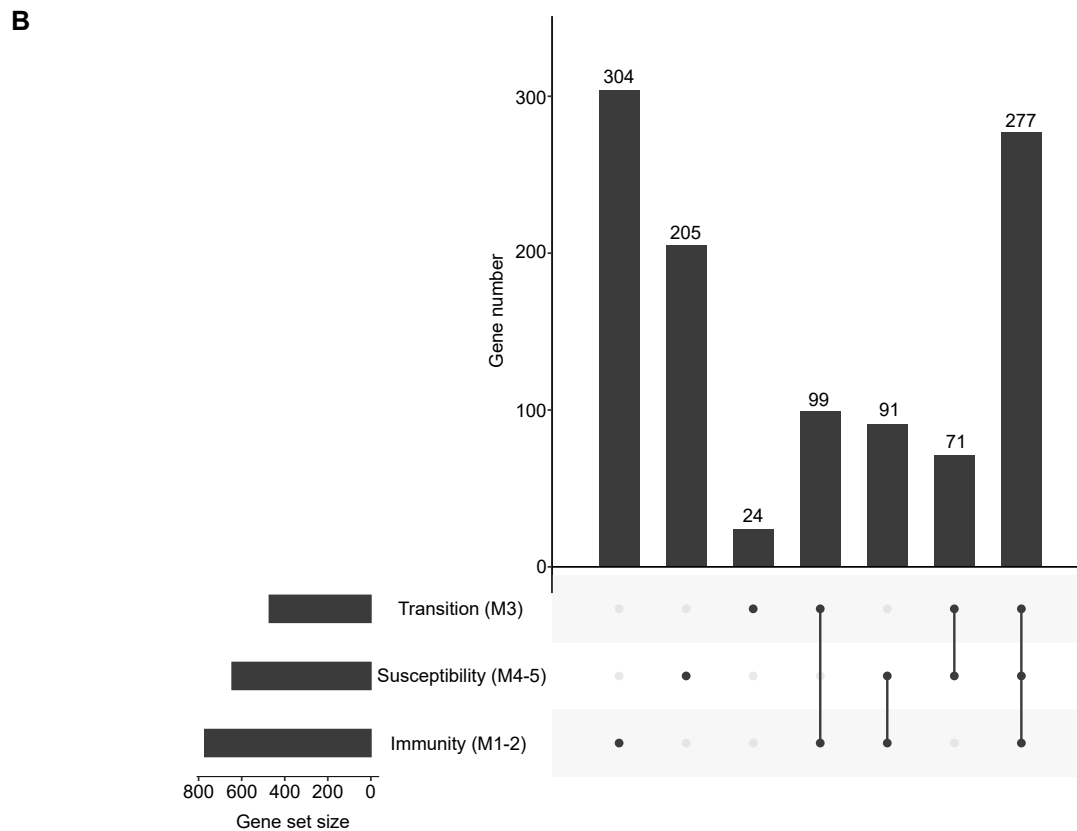

**Figure S4. Re-clustering of Mock- and DC3000-treated cells and differentially expressed genes in pathogen responsive clusters. Related to Figure 2.**  
 (A) UMAP plots of re-clustering for mock-treated samples (left) and *Pst* DC3000-treated samples (right). (B) Overlap among genes identified as differentially expressed among different pathogen-responsive mesophyll cell types in single-cell data ( $\log_2$ -fold change > 0.5, adjusted p-value < 0.01, and negative binomial test using DESeq2).



Figure S5

**A**

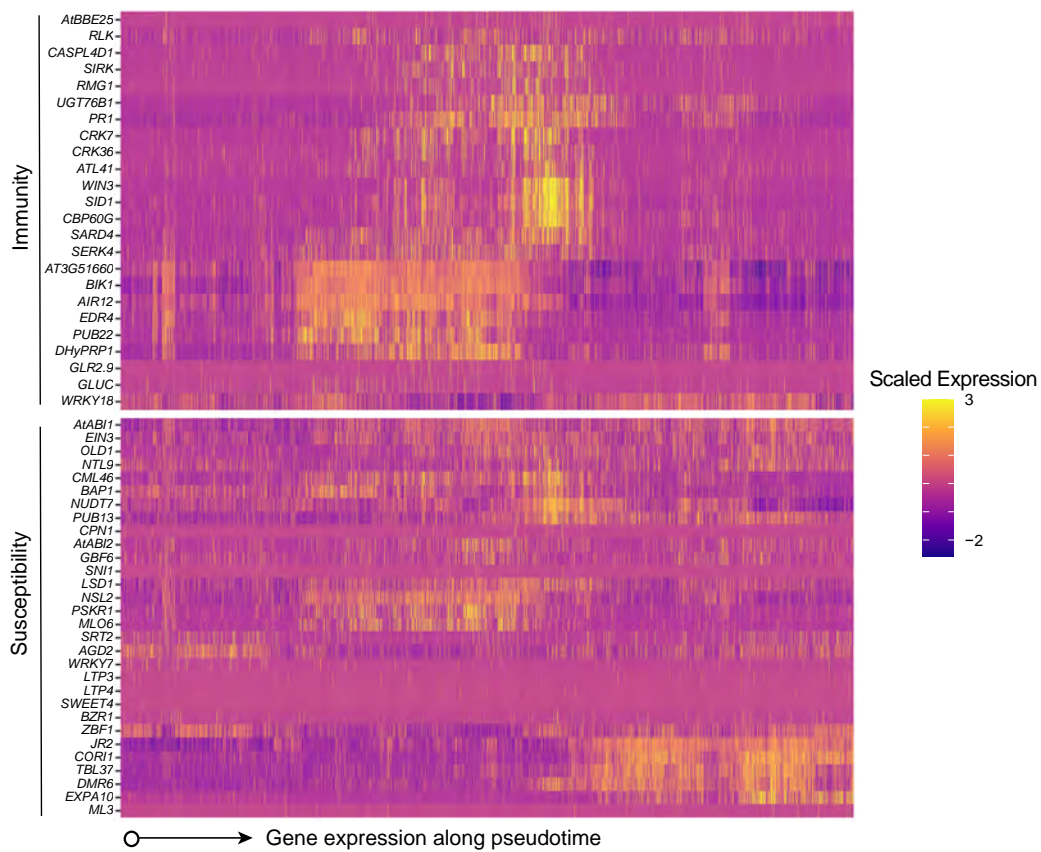

**B**

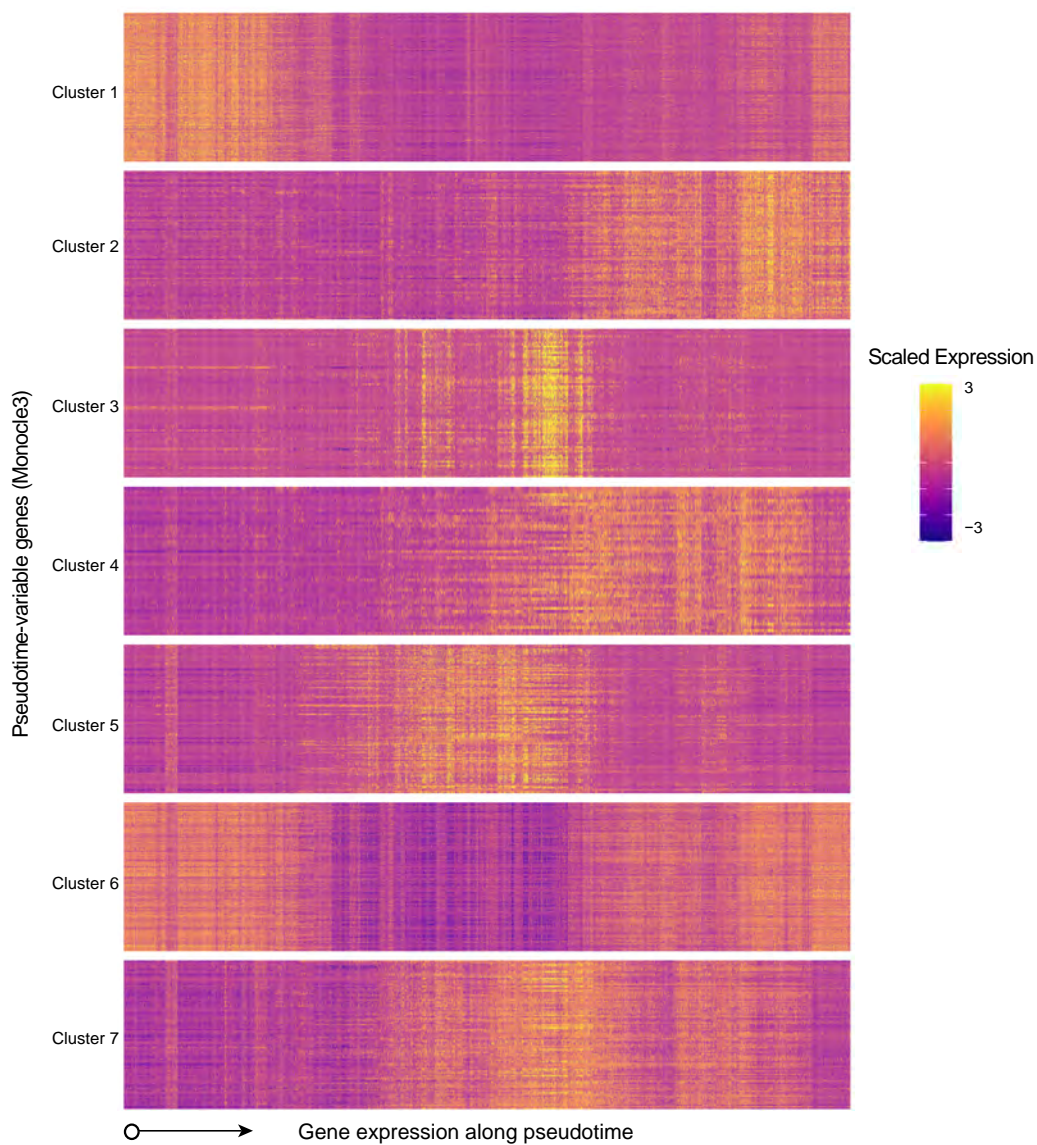



**Figure S5. Variation of characterized and uncharacterized pathogen-responsive genes along pseudotime. Related to Figure 2 and Table S1C.**

(A) Expression is shown for genes known to be involved in pathogen responsiveness. Known genes are organized based on their suspected involvement in immunity (top) or in disease susceptibility (bottom) and expression in individual cells are depicted varying along pseudotime on the X-axis. (B) Additional clusters of genes exhibiting similar expression patterns that vary with pseudotime were identified using monocle3. Additional genes are organized based on a hierarchical clustering of scaled expression profiles over pseudotime. Y-axis represents individual genes within a cluster, and the X-axis represents expression in individual cells organized along pseudotime.

Figure S6

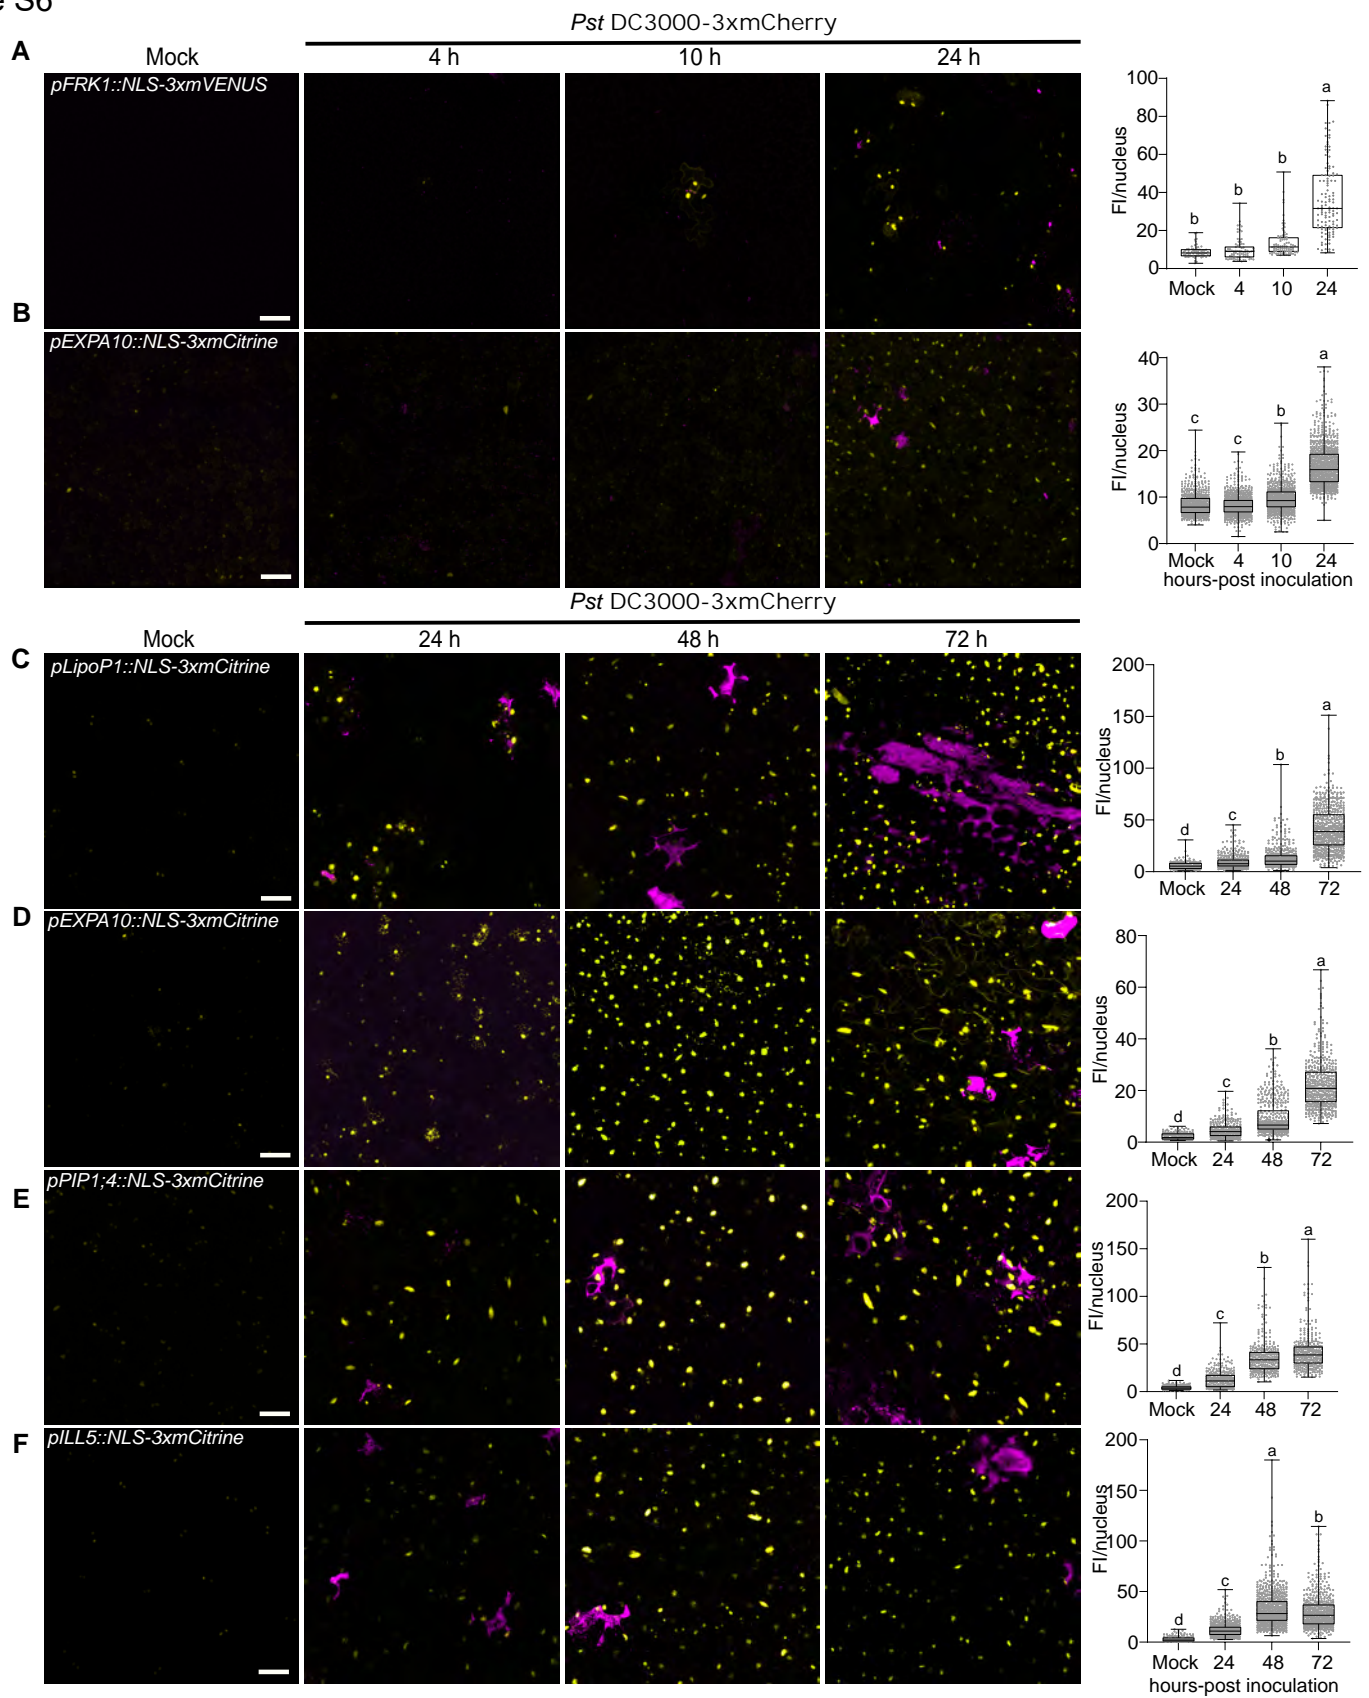

**Figure S6. Visualization of immune and susceptible cellular markers during disease progression. Related to Figure 3-5.**

(A-B) Expression of immune marker *FRK1* and susceptible marker *EXPA10* at early infection stages. Two-week-old transgenic *Arabidopsis* seedlings grown on Murashige-Skoog plates were surface-inoculated with mCherry-tagged *Pst* DC3000 at concentration of  $1 \times 10^7$  colony forming units/ml (CFU/ml). Left: Representative images of marker gene expression at different infection stages. Mock images are taken at 24 h. Pictures are maximum projections from confocal Z stacks. Right: Mean fluorescence intensity (FI, mean gray values) per nucleus was calculated and boxplot shows median with minimum and maximum values indicated ( $n = 6$  images from 3 plants). Different letters indicate statistically significant differences ( $p < 0.0001$ , ANOVA with Tukey test). Scale bars: 50  $\mu\text{m}$ . Experiments were repeated two times with similar results. (C-F) Data represent experiments with a second, independent transgenic line for promoter-reporter constructs (line 2). (C) The immune marker *LipoP1* is highly expressed during infection. The promoter-reporter line for this immune marker was generated with fusion to 3xfluorophore possessing a nuclear localization signal (NLS). Plants were inoculated as described in (A). (D, E and F) The susceptible markers *EXPA10* (D), *PIP1;4* (E) and *ILL5* (F) are highly induced at late infection stages. Promoter-reporter lines for each susceptible marker were generated as mentioned in (C).

Figure S7

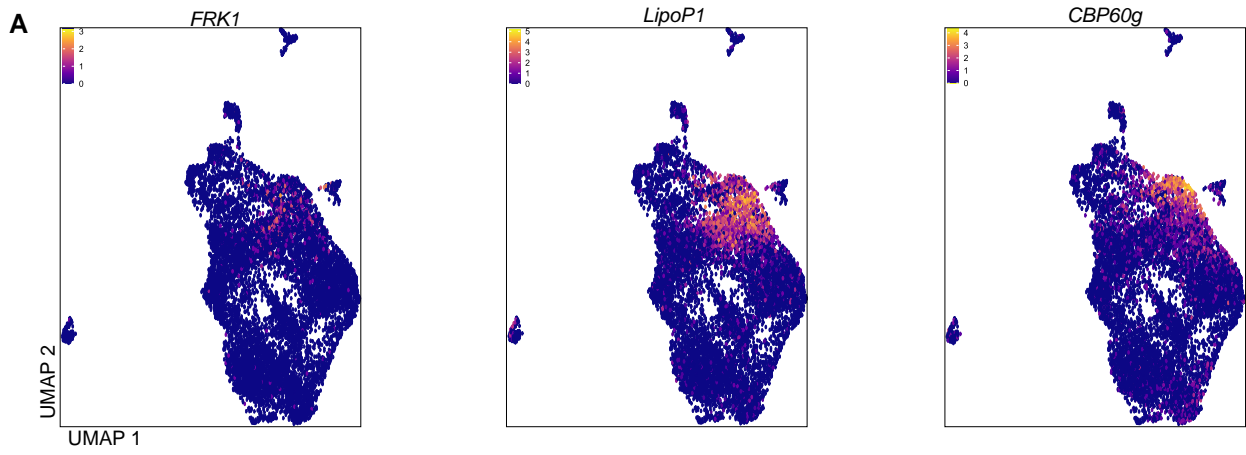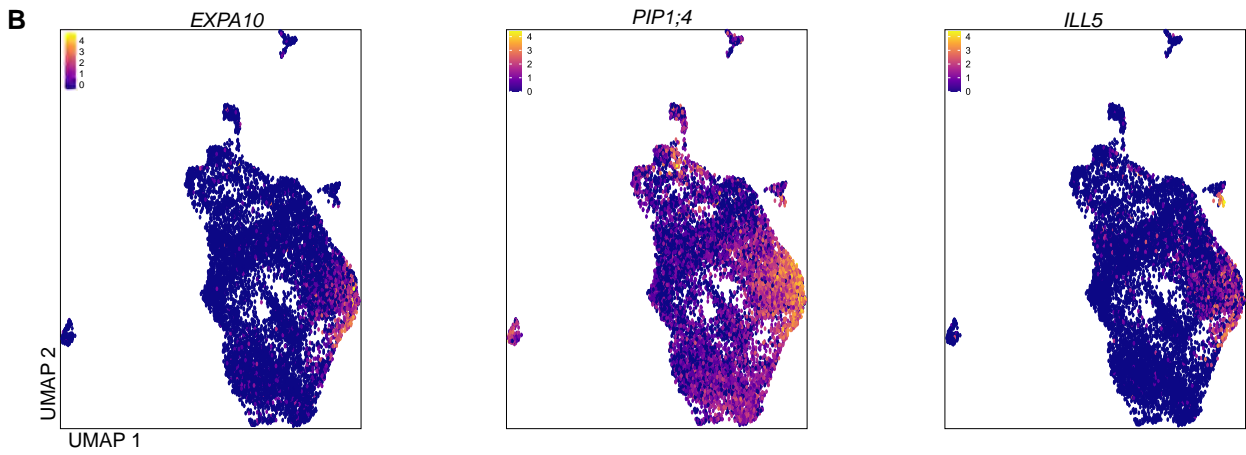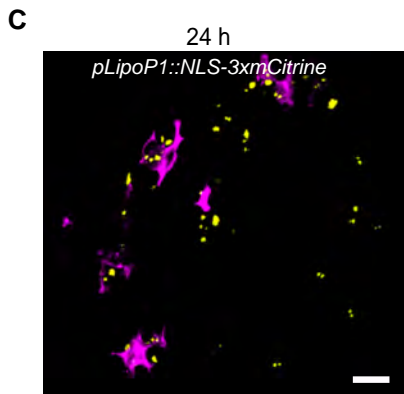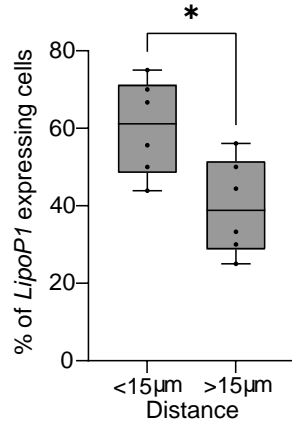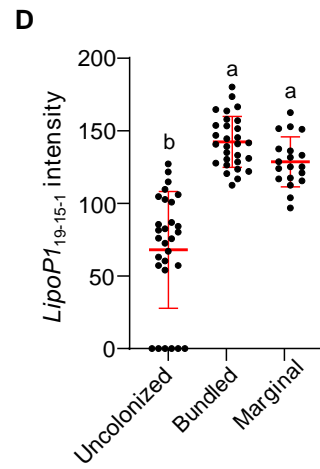

**E** Expression patterns of *CBP60g* at 24 hpi from four independent lines

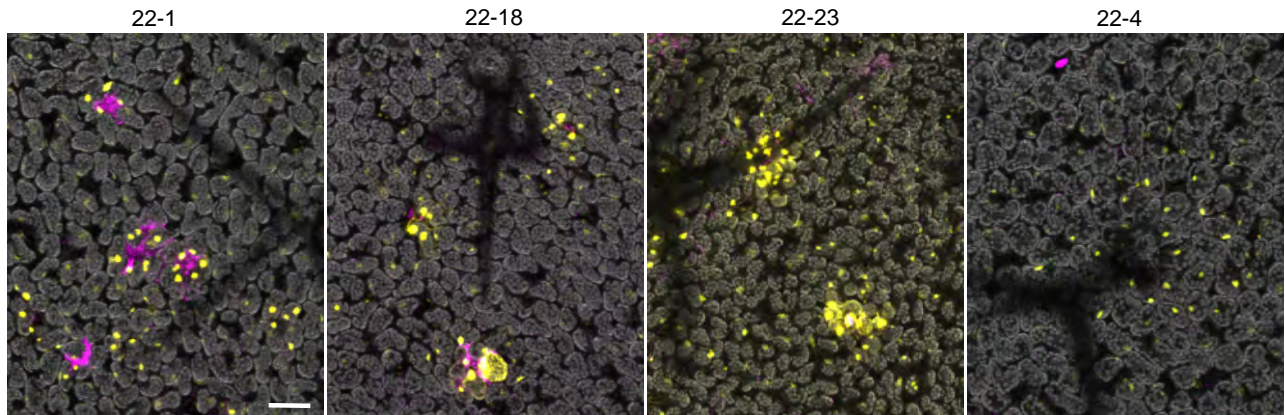

**Figure S7. Feature plots of marker genes and expression pattern of immune markers. Related to Figure 3-5.**

(A-B) Feature plots of immune (A) and susceptible (B) markers in all cell clusters. (C) Expression of the immune marker *LipoP1* (line 19-15-1) is proximal to bacterial colonies. Two-week old *Arabidopsis pLipoP1::NLS-3xmCitrine* seedlings were flood-inoculated with mCherry-tagged *Pst* DC3000. Left: Maximum projections of Z stack of mVENUS and mCherry signals. Each yellow dot indicates a single nucleus. Scale bar: 20  $\mu$ m. Right: Percentage of *LipoP1* expressing cells that are proximal (<15  $\mu$ m) or distal (>15  $\mu$ m) to a bacterial colony 24 hpi. Boxplot shows median with minimum and maximum values indicated (n = 6 images from 3 plants). \*p < 0.05 analyzed by two-tailed, unpaired Student's t-test. (D) Expression of *LipoP1* in bundled and marginal patterns was significantly higher than in uncolonized regions. Data are means  $\pm$  SD (n = 9 images from 6 plants). Different letters indicate statistically significant differences (p < 0.0001, ANOVA with Tukey test). (E) Expression patterns of different *CBP60g* lines (22-1, 22-4, 22-18 and 22-23) at 24 hpi. Two-week old *Arabidopsis pCBP60g::NLS-3xmCitrine* seedlings were flood-inoculated with mCherry-tagged *Pst* DC3000. Pictures are maximum projections from confocal Z stacks of mCitrine, mCherry and chlorophyll autofluorescence signals. Chlorophyll autofluorescence is shown in gray. Scale bars: 20  $\mu$ m

**Table S3. Primers used in this study. Related to Figures 3 and 4.**

| TAIR/AGI  | Group       | Gene symbol   | Direction | Sequence (5'-3')                         | Source     |
|-----------|-------------|---------------|-----------|------------------------------------------|------------|
| AT3G18250 | Immune      | <i>LipoP1</i> | Forward   | CCCCTTCACCAGAAGCTGTACAAGAAAGTCG          | This study |
|           |             |               | Reverse   | CTCTTCTTCTTTGGCATCTCTTTCTCTAGTTAATGTGG   |            |
| AT5G26920 | Immune      | <i>CBP60g</i> | Forward   | GCCCCCTTCACCTGGCTCGATCAAACCTTAGATATCAATC | This study |
|           |             |               | Reverse   | CTTCTTCTTTGGCATTGATCACTTTTAGGTTTAGAG     |            |
| AT1G26770 | Susceptible | <i>EXPA10</i> | Forward   | GCCGCCCTTCACCCGTATAGATAATAATTAATGAATC    | This study |
|           |             |               | Reverse   | CTCTTCTTCTTTGGCATGGGTGATATAAAATCAATTACTT |            |
| AT4G00430 | Susceptible | <i>PIP1;4</i> | Forward   | CCCCCTTCACCCGAACCTTACTAGTTACTATCTACC     | This study |
|           |             |               | Reverse   | TTCTTCTTTGGCATTCTCTCCCTCTCCCTC           |            |
| AT1G51780 | Susceptible | <i>ILL5</i>   | Forward   | CGCCCCCTTCACCTCTCACAGTATTAG              | This study |
|           |             |               | Reverse   | CTTCTTCTTTGGCATCGTGAATCAAGAGATTGC        |            |



## Supplemental references

- [1] Kim, J.-Y., Symeonidi, E., Pang, T.Y., Denyer, T., Weidauer, D., Bezruczyk, M., Miras, M., Zöllner, N., Hartwig, T., and Wudick, M.M. (2021). Distinct identities of leaf phloem cells revealed by single cell transcriptomics. *The Plant Cell* **33**, 511–530.
- [2] Liu, Z., Zhou, Y., Guo, J., Li, J., Tian, Z., Zhu, Z., Wang, J., Wu, R., Zhang, B., and Hu, Y. (2020). Global dynamic molecular profiling of stomatal lineage cell development by single-cell RNA sequencing. *Molecular Plant* **13**, 1178–1193.
- [3] Lopez-Anido, C.B., Vatén, A., Smoot, N.K., Sharma, N., Guo, V., Gong, Y., Gil, M.X.A., Weimer, A.K., and Bergmann, D.C. (2021). Single-cell resolution of lineage trajectories in the *Arabidopsis* stomatal lineage and developing leaf. *Developmental Cell* **56**, 1043-1055. e4.
- [4] Procko, C., Lee, T., Borsuk, A., Bargmann, B.O., Dabi, T., Nery, J.R., Estelle, M., Baird, L., O'Connor, C., and Brodersen, C. (2022). Leaf cell-specific and single-cell transcriptional profiling reveals a role for the palisade layer in UV light protection. *The Plant Cell* **34**, 3261-3279
- [5] Zhang, T.-Q., Chen, Y., and Wang, J.-W. (2021). A single-cell analysis of the *Arabidopsis* vegetative shoot apex. *Developmental Cell* **56**, 1056-1074. e8.
